# Supplementary material for: Prognostic implications of EGFR protein expression in sporadic colorectal tumors: Correlation with copy number status, mRNA levels and miRNA regulation
Source: PubMed Central journal article supplement (PMC7070091; doi:10.1038/s41598-020-61688-7), 2020-03-13
Supplement: 41598_2020_61688_MOESM1_ESM.pdf [file 41598_2020_61688_MOESM1_ESM.pdf]

**Title:** Prognostic implications of EGFR protein expression in sporadic colorectal tumors: Correlation with copy number status, mRNA levels and miRNA regulation

**Running title:** Biomarkers in Colorectal Cancer

**Authors:** Sofía del Carmen MD<sup>#1</sup>, Luís Antonio Corchete<sup>2</sup>, Ruth Gervas<sup>1</sup>, Alba Rodríguez<sup>1</sup>, María García MD<sup>3</sup>, José Antonio Álcazar MD, PhD<sup>4</sup>, Jacinto García MD, PhD<sup>4</sup>, Oscar Bengoechea MD, PhD<sup>1</sup>, Luis Muñoz Bellvis MD, PhD\*<sup>4</sup>, José María Sayagués PhD\*<sup>#1</sup> and Mar Abad MD, PhD\*<sup>#1</sup>

\*These authors contributed equally to this work and should be considered senior last authors.

#These authors should be considered corresponding authors.

**Affiliations:** <sup>1</sup>Department of Pathology and IBSAL, University Hospital of Salamanca, Salamanca, Spain; <sup>2</sup>Cancer Research Center and Hematology Service (University Hospital of Salamanca), Salamanca, Spain; <sup>3</sup>Department of Oncology, University Hospital of Salamanca; <sup>4</sup>General and Gastrointestinal Surgery Service, University Hospital of Salamanca.

**Declaration of conflict of interest:** The authors declare no potential conflicts of interest with respect to the research, authorship and publication of this article.

**Keywords:** Colorectal cancer, EGFR, TNM, FISH, SNPs, GEP, immunohistochemistry.

**Reprint requests to:**

**Maria del Mar Abad, MD, PhD**

University Hospital of Salamanca  
Department of Pathology and IBSAL  
Paseo de San Vicente, 58-182  
37007 Salamanca, Spain  
Tel: +34 923 090470  
E-mail: [marabad@usal.es](mailto:marabad@usal.es)

**José María Sayagués, PhD**

Institute for Biomedical Research of Salamanca (IBSAL)  
Paseo de San Vicente, 58-182  
37007 Salamanca, Spain  
Tel: +34 923 090470  
E-mail: [ppmari@usal.es](mailto:ppmari@usal.es)

**Supplementary Table 1.** Gene transcripts differentially expressed in primary metastatic vs non-metastatic sCRC tumors (n=23 vs n=25, respectively) vs non-tumoral colorectal tissues (n=9).

| Gene Symbol      | Affymetrix ID code  | MTX vs non-MTX |        | MTX vs non-tumoral |        | non-MTX vs non-tumoral |        |
|------------------|---------------------|----------------|--------|--------------------|--------|------------------------|--------|
|                  |                     | Fold Change    | FDR    | Fold Change        | FDR    | Fold Change            | FDR    |
| ACA10            | ACA10_s_st          | -2.15          | 0.034  | 3.83               | <0.001 | 3.47                   | <0.001 |
| ACA21            | ACA21_st            | -2.44          | 0.046  | 2.09               | 0.044  | 3.48                   | 0.001  |
| ACA24            | ACA24_s_st          | -4.22          | 0.007  |                    |        | -2.18                  | <0.001 |
| ACA26            | ACA26_st            | -2.01          | 0.030  | 3.06               | <0.001 | 3.48                   | <0.001 |
| ACA52            | ACA52_st            | -2.12          | 0.023  | 3.01               | <0.001 | 3.48                   | <0.001 |
| ACA57            | ACA57_st            | -2.32          | 0.040  |                    |        | -2.36                  | 0.002  |
| ACTA2            | ENSG00000107796_at  | 2.30           | 0.034  | 6.58               | 0.001  | 6.80                   | <0.001 |
| ADGRG7           | ENSG00000144820_at  | -2.31          | 0.026  |                    |        | 2.14                   | 0.036  |
| ADH1B            | ENSG00000196616_at  | 2.39           | 0.039  |                    |        | 2.20                   | 0.021  |
| AEBP1            | ENSG00000106624_at  | 2.41           | 0.024  |                    |        | 2.15                   | <0.001 |
| AKAP12           | ENSG00000131016_at  | 2.51           | 0.032  | 9.68               | <0.001 | 6.09                   | <0.001 |
| ANP32E           | ENSG00000143401_at  | -2.38          | 0.002  | 3.49               | 0.001  | 7.65                   | <0.001 |
| ASPN             | ENSG00000106819_at  | 2.15           | 0.038  | -3.30              | <0.001 | -2.95                  | <0.001 |
| BST2             | ENSG00000130303_at  | -2.66          | 0.048  |                    |        |                        |        |
| CASP1            | ENSG00000137752_at  | -2.24          | 0.025  |                    |        | 2.26                   | 0.018  |
| CNN1             | ENSG00000130176_at  | 2.23           | 0.038  | 7.07               | <0.001 | 5.85                   | <0.001 |
| COMP             | ENSG00000105664_at  | 2.96           | 0.034  | 2.16               | 0.046  |                        |        |
| CXCL3            | ENSG00000163734_at  | -2.60          | 0.015  |                    |        | 2.35                   | 0.004  |
| CXCL5            | ENSG00000163735_at  | -4.14          | 0.019  | 9.91               | <0.001 | 9.82                   | <0.001 |
| CYP1B1           | ENSG00000138061_at  | 2.23           | 0.040  | 2.24               | 0.040  | 2.15                   | 0.029  |
| DES              | ENSG00000175084_at  | 2.63           | 0.046  | 6.48               | <0.001 | 6.03                   | <0.001 |
| FABP4            | ENSG00000170323_at  | 6.06           | 0.029  | 3.11               | 0.040  | 5.80                   | 0.001  |
| FBXO32           | ENSG00000156804_at  | 2.10           | 0.008  | 13.06              | <0.001 | 6.35                   | 0.001  |
| FER1L4           | ENSG00000088340_at  | 2.06           | 0.050  |                    |        | 2.92                   | 0.012  |
| GRP              | ENSG00000134443_at  | 2.39           | 0.023  | -2.58              | 0.001  | -2.26                  | 0.004  |
| HBII-115         | HBII-115_st         | -2.32          | 0.028  | 2.89               | 0.001  | 3.49                   | <0.001 |
| HBII-180A        | HBII-180A_x_st      | -2.49          | 0.005  | 3.49               | <0.001 | 3.49                   | <0.001 |
| HBII-180C        | HBII-180C_x_st      | -2.40          | 0.024  | 3.57               | 0.001  | 3.49                   | 0.001  |
| HBII-85-26       | HBII-85-26_st       | -5.02          | <0.001 | -2.35              | 0.001  |                        |        |
| HBII-85-6        | HBII-85-6_x_st      | -3.30          | 0.001  |                    |        |                        |        |
| HMCN1            | ENSG00000143341_at  | 2.03           | 0.039  |                    |        | 2.79                   | <0.001 |
| hp_hsa-mir-3648  | hp_hsa-mir-3648_st  | -2.11          | 0.020  | 2.73               | <0.001 | 3.52                   | <0.001 |
| hp_hsa-mir-3676  | hp_hsa-mir-3676_st  | -3.62          | 0.007  |                    |        |                        |        |
| hp_hsa-mir-4449  | hp_hsa-mir-4449_st  | -2.64          | 0.002  | 2.40               | 0.005  | 3.53                   | <0.001 |
| hp_hsa-mir-4634  | hp_hsa-mir-4634_st  | -2.02          | 0.034  | 2.65               | 0.015  | 3.54                   | 0.001  |
| hp_hsa-mir-548ai | hp_hsa-mir-548ai_st | -4.55          | <0.001 |                    |        | 3.61                   | <0.001 |
| hsa-let-7f       | hsa-let-7f_st       | 2.20           | 0.013  | 2.30               | 0.006  | 3.56                   | <0.001 |
| hsa-miR-1180     | hsa-miR-1180_st     | -2.01          | 0.041  |                    |        | 2.17                   | <0.001 |

|                   |                      |       |       |       |        |       |        |
|-------------------|----------------------|-------|-------|-------|--------|-------|--------|
| hsa-miR-1202      | hsa-miR-1202_st      | -2.20 | 0.023 | 4.70  | <0.001 | 3.57  | <0.001 |
| hsa-miR-122       | hsa-miR-122_st       | 2.39  | 0.001 | -2.24 | 0.005  | -2.18 | 0.005  |
| hsa-miR-1225-5p   | hsa-miR-1225-5p_st   | -2.46 | 0.030 | 2.80  | <0.001 | 3.58  | <0.001 |
| hsa-miR-1231      | hsa-miR-1231_st      | -2.49 | 0.012 | 2.19  | <0.001 | 3.59  | <0.001 |
| hsa-miR-1285      | hsa-miR-1285_st      | -2.14 | 0.012 | 2.61  | 0.002  | 3.59  | <0.001 |
| hsa-miR-1307      | hsa-miR-1307_st      | -3.99 | 0.005 | 2.81  | <0.001 | 3.62  | <0.001 |
| hsa-miR-130b      | hsa-miR-130b_st      | -3.43 | 0.006 | 2.09  | 0.010  | 3.64  | <0.001 |
| hsa-miR-135b-star | hsa-miR-135b-star_st | -2.06 | 0.010 | 4.26  | <0.001 | 3.67  | <0.001 |
| hsa-miR-1469      | hsa-miR-1469_st      | -2.04 | 0.008 | 2.26  | <0.001 | 3.69  | <0.001 |
| hsa-miR-146a      | hsa-miR-146a_st      | -2.51 | 0.018 | 2.32  | 0.001  | 2.66  | <0.001 |
| hsa-miR-150-star  | hsa-miR-150-star_st  | -2.65 | 0.011 | 15.90 | <0.001 | 3.69  | 0.015  |
| hsa-miR-17-star   | hsa-miR-17-star_st   | -2.65 | 0.018 | 2.48  | 0.011  | 3.74  | <0.001 |
| hsa-miR-18a-star  | hsa-miR-18a-star_st  | -2.24 | 0.021 | 4.15  | <0.001 | 3.76  | <0.001 |
| hsa-miR-1909      | hsa-miR-1909_st      | -2.12 | 0.036 | 3.24  | <0.001 | 3.79  | <0.001 |
| hsa-miR-1910      | hsa-miR-1910_st      | -2.30 | 0.004 | 2.50  | 0.039  | 3.80  | 0.002  |
| hsa-miR-194-star  | hsa-miR-194-star_st  | -3.06 | 0.013 |       |        |       |        |
| hsa-miR-19a       | hsa-miR-19a_st       | -2.54 | 0.010 |       |        | 2.05  | 0.001  |
| hsa-miR-19b       | hsa-miR-19b_st       | -2.36 | 0.006 |       |        | 3.10  | 0.001  |
| hsa-miR-200a-star | hsa-miR-200a-star_st | -3.06 | 0.013 |       |        | 2.38  | <0.001 |
| hsa-miR-21        | hsa-miR-21_st        | 2.08  | 0.001 |       |        | 2.03  | 0.008  |
| hsa-miR-23a-star  | hsa-miR-23a-star_st  | -2.74 | 0.004 | 2.74  | <0.001 | 3.85  | <0.001 |
| hsa-miR-25-star   | hsa-miR-25-star_st   | -3.55 | 0.001 | 3.27  | <0.001 | 3.85  | <0.001 |
| hsa-miR-27a-star  | hsa-miR-27a-star_st  | -4.40 | 0.002 | 2.32  | 0.035  | 3.87  | 0.001  |
| hsa-miR-3156-5p   | hsa-miR-3156-5p_st   | -2.65 | 0.005 | 2.24  | 0.021  | 3.88  | 0.001  |
| hsa-miR-3175      | hsa-miR-3175_st      | -3.57 | 0.027 | 4.05  | <0.001 | 3.90  | <0.001 |
| hsa-miR-3176      | hsa-miR-3176_st      | -3.01 | 0.003 |       |        | 2.23  | 0.003  |
| hsa-miR-3178      | hsa-miR-3178_st      | -2.71 | 0.044 | 2.78  | <0.001 | 3.91  | <0.001 |
| hsa-miR-3188      | hsa-miR-3188_st      | -3.02 | 0.011 | 2.37  | 0.018  | 3.95  | <0.001 |
| hsa-miR-3195      | hsa-miR-3195_st      | -2.87 | 0.019 | 2.95  | <0.001 | 3.97  | <0.001 |
| hsa-miR-324-5p    | hsa-miR-324-5p_st    | -2.09 | 0.041 |       |        |       |        |
| hsa-miR-330-3p    | hsa-miR-330-3p_st    | -2.53 | 0.012 | 3.69  | 0.002  | 5.34  | <0.001 |
| hsa-miR-339-3p    | hsa-miR-339-3p_st    | -2.66 | 0.013 |       |        | 2.11  | <0.001 |
| hsa-miR-3613-3p   | hsa-miR-3613-3p_st   | -4.04 | 0.001 | 8.10  | <0.001 | 3.98  | <0.001 |
| hsa-miR-3615      | hsa-miR-3615_st      | -2.21 | 0.002 | 3.20  | 0.001  | 3.98  | <0.001 |
| hsa-miR-362-5p    | hsa-miR-362-5p_st    | -3.99 | 0.016 | 2.68  | 0.005  | 4.00  | <0.001 |
| hsa-miR-3663-3p   | hsa-miR-3663-3p_st   | -2.32 | 0.013 | 2.68  | <0.001 | 4.06  | <0.001 |
| hsa-miR-374b      | hsa-miR-374b_st      | 2.34  | 0.029 |       |        | 3.79  | 0.001  |
| hsa-miR-378       | hsa-miR-378_st       | -2.86 | 0.012 |       |        | 2.23  | 0.017  |
| hsa-miR-378c      | hsa-miR-378c_st      | -3.33 | 0.014 |       |        | 3.17  | 0.009  |
| hsa-miR-378d      | hsa-miR-378d_st      | -2.85 | 0.016 |       |        | 2.17  | 0.017  |
| hsa-miR-378e      | hsa-miR-378e_st      | -2.22 | 0.008 |       |        | 2.15  | 0.008  |
| hsa-miR-378f      | hsa-miR-378f_st      | -2.97 | 0.014 |       |        | 3.30  | 0.013  |
| hsa-miR-378g      | hsa-miR-378g_st      | -2.59 | 0.020 |       |        |       |        |
| hsa-miR-378i      | hsa-miR-378i_st      | -2.91 | 0.013 |       |        | 2.36  | 0.013  |
| hsa-miR-422a      | hsa-miR-422a_st      | -3.36 | 0.007 |       |        | 2.49  | 0.001  |
| hsa-miR-423-3p    | hsa-miR-423-3p_st    | -2.11 | 0.036 |       |        | 2.09  | 0.002  |

|                  |                     |       |       |       |        |      |        |
|------------------|---------------------|-------|-------|-------|--------|------|--------|
| hsa-miR-425-star | hsa-miR-425-star_st | -2.20 | 0.034 |       |        | 2.01 | 0.022  |
| hsa-miR-4286     | hsa-miR-4286_st     | -3.51 | 0.003 |       |        | 2.37 | 0.001  |
| hsa-miR-4322     | hsa-miR-4322_st     | -2.02 | 0.017 | 4.52  | <0.001 | 4.08 | <0.001 |
| hsa-miR-4329     | hsa-miR-4329_st     | 2.05  | 0.032 | 4.40  | <0.001 | 4.09 | <0.001 |
| hsa-miR-4440     | hsa-miR-4440_st     | -2.68 | 0.023 | 2.74  | 0.010  | 4.13 | <0.001 |
| hsa-miR-4443     | hsa-miR-4443_st     | -3.07 | 0.031 | 2.35  | 0.001  | 4.17 | <0.001 |
| hsa-miR-4449     | hsa-miR-4449_st     | -3.83 | 0.005 | 2.82  | 0.005  | 4.18 | <0.001 |
| hsa-miR-4454     | hsa-miR-4454_st     | -3.29 | 0.004 |       |        | 2.07 | 0.001  |
| hsa-miR-4492     | hsa-miR-4492_st     | -2.89 | 0.014 | 2.65  | 0.016  | 4.20 | <0.001 |
| hsa-miR-4505     | hsa-miR-4505_st     | -2.94 | 0.016 | 2.72  | 0.001  | 4.23 | <0.001 |
| hsa-miR-4507     | hsa-miR-4507_st     | -2.61 | 0.011 | 4.45  | <0.001 | 4.27 | <0.001 |
| hsa-miR-4532     | hsa-miR-4532_st     | -2.69 | 0.035 |       |        | 2.18 | 0.001  |
| hsa-miR-4634     | hsa-miR-4634_st     | -2.79 | 0.025 | 3.25  | 0.001  | 4.27 | <0.001 |
| hsa-miR-4651     | hsa-miR-4651_st     | -2.30 | 0.010 | 3.29  | <0.001 | 4.31 | <0.001 |
| hsa-miR-4665-5p  | hsa-miR-4665-5p_st  | -2.04 | 0.021 | 3.20  | 0.022  | 4.34 | 0.004  |
| hsa-miR-4668-5p  | hsa-miR-4668-5p_st  | -4.36 | 0.001 |       |        | 2.14 | 0.001  |
| hsa-miR-4674     | hsa-miR-4674_st     | -2.75 | 0.010 | 2.60  | 0.037  | 4.34 | 0.001  |
| hsa-miR-4690-5p  | hsa-miR-4690-5p_st  | -2.33 | 0.012 | 5.52  | 0.005  | 4.39 | 0.012  |
| hsa-miR-4707-5p  | hsa-miR-4707-5p_st  | -2.47 | 0.021 | 2.69  | 0.004  | 4.40 | <0.001 |
| hsa-miR-4721     | hsa-miR-4721_st     | -2.39 | 0.005 | 8.73  | <0.001 | 4.48 | <0.001 |
| hsa-miR-4734     | hsa-miR-4734_st     | -3.44 | 0.015 | 4.45  | 0.002  | 4.52 | 0.001  |
| hsa-miR-4741     | hsa-miR-4741_st     | -2.37 | 0.020 | 3.12  | 0.008  | 4.53 | 0.001  |
| hsa-miR-4745-5p  | hsa-miR-4745-5p_st  | -2.57 | 0.012 | 3.28  | <0.001 | 4.58 | <0.001 |
| hsa-miR-4767     | hsa-miR-4767_st     | -2.13 | 0.005 | 3.24  | <0.001 | 4.61 | <0.001 |
| hsa-miR-4786-5p  | hsa-miR-4786-5p_st  | -2.66 | 0.005 |       |        | 2.30 | 0.001  |
| hsa-miR-4793-3p  | hsa-miR-4793-3p_st  | -2.57 | 0.043 | 2.88  | 0.008  | 4.63 | <0.001 |
| hsa-miR-500a     | hsa-miR-500a_st     | -2.39 | 0.030 | 5.66  | <0.001 | 4.63 | <0.001 |
| hsa-miR-501-3p   | hsa-miR-501-3p_st   | -2.06 | 0.038 |       |        | 2.54 | <0.001 |
| hsa-miR-501-5p   | hsa-miR-501-5p_st   | -2.43 | 0.027 | 4.37  | <0.001 | 4.66 | <0.001 |
| hsa-miR-513a-5p  | hsa-miR-513a-5p_st  | -2.09 | 0.015 |       |        | 2.32 | 0.001  |
| hsa-miR-532-5p   | hsa-miR-532-5p_st   | -2.91 | 0.021 | 3.40  | <0.001 | 4.66 | <0.001 |
| hsa-miR-652      | hsa-miR-652_st      | -2.42 | 0.048 |       |        | 2.03 | <0.001 |
| hsa-miR-663      | hsa-miR-663_st      | -2.59 | 0.048 | 6.45  | 0.001  | 4.69 | 0.004  |
| hsa-miR-671-5p   | hsa-miR-671-5p_st   | -2.10 | 0.004 |       |        |      |        |
| hsa-miR-675      | hsa-miR-675_st      | -2.16 | 0.014 | 2.74  | 0.010  | 4.72 | <0.001 |
| hsa-miR-720      | hsa-miR-720_st      | -4.02 | 0.014 |       |        | 2.02 | <0.001 |
| hsa-miR-92b-star | hsa-miR-92b-star_st | -2.10 | 0.020 | 3.27  | 0.005  | 4.75 | <0.001 |
| hsa-miR-933      | hsa-miR-933_st      | -2.04 | 0.008 |       |        | 2.09 | 0.001  |
| hsa-miR-939      | hsa-miR-939_st      | -2.12 | 0.035 | 6.62  | <0.001 | 4.78 | 0.001  |
| hsa-miR-93-star  | hsa-miR-93-star_st  | -3.24 | 0.008 | 3.80  | 0.001  | 4.81 | <0.001 |
| IL13RA2          | ENSG00000123496_at  | -2.13 | 0.012 | 4.43  | 0.004  | 7.42 | <0.001 |
| ITGA7            | ENSG00000135424_at  | 2.18  | 0.018 | 9.81  | <0.001 | 7.07 | <0.001 |
| LCN2             | ENSG00000148346_at  | -2.79 | 0.034 | 15.39 | <0.001 | 9.02 | <0.001 |
| MAP1B            | ENSG00000131711_at  | 2.13  | 0.004 | 4.32  | <0.001 | 7.06 | <0.001 |
| mgh18S-121       | mgh18S-121_st       | -2.59 | 0.025 |       |        | 2.13 | <0.001 |
| mgh28S-2411      | mgh28S-2411_st      | -2.56 | 0.032 | 4.95  | 0.040  | 4.83 | 0.044  |

|          |                      |       |       |       |        |       |        |
|----------|----------------------|-------|-------|-------|--------|-------|--------|
| MGP      | ENSG00000111341_at   | 2.69  | 0.012 | 5.52  | <0.001 | 6.82  | <0.001 |
| MMP10    | ENSG00000166670_at   | -2.35 | 0.012 | 8.37  | <0.001 | 8.18  | <0.001 |
| MMP3     | ENSG00000149968_at   | -3.78 | 0.017 |       |        | 2.56  | 0.009  |
| MOCOS    | ENSG00000075643_at   | -3.10 | 0.001 | 6.66  | <0.001 | 8.27  | <0.001 |
| MYH11    | ENSG00000133392_at   | 2.69  | 0.013 | 2.06  | 0.026  | 2.13  | 0.006  |
| MYL9     | ENSG00000101335_at   | 2.17  | 0.008 | 6.35  | <0.001 | 6.52  | <0.001 |
| OIP5     | ENSG00000104147_at   | -2.01 | 0.024 | 7.45  | <0.001 | 8.84  | <0.001 |
| PBK      | ENSG00000168078_at   | -2.32 | 0.005 | 5.28  | <0.001 | 8.68  | <0.001 |
| PCOLCE2  | ENSG00000163710_at   | 2.51  | 0.007 | 3.85  | <0.001 | 6.34  | <0.001 |
| PIGR     | ENSG00000162896_at   | -4.20 | 0.041 |       |        | 2.01  | 0.021  |
| PRAP1    | ENSG00000165828_at   | 2.15  | 0.032 | 4.11  | 0.015  | 6.05  | <0.001 |
| REG1A    | ENSG00000115386_at   | -9.45 | 0.016 | 4.69  | 0.018  | 14.47 | <0.001 |
| REG3A    | ENSG00000172016_at   | -8.46 | 0.006 | 10.84 | <0.001 | 10.48 | <0.001 |
| SALL4    | ENSG00000101115_at   | 2.02  | 0.005 |       |        | 2.46  | 0.012  |
| SFRP4    | ENSG00000106483_at   | 3.18  | 0.012 |       |        | 2.37  | 0.032  |
| SLIT2    | ENSG00000145147_at   | 2.11  | 0.003 | 4.15  | <0.001 | 7.24  | <0.001 |
| SNORA24  | ENSG00000207130_s_st | -3.22 | 0.010 | 2.01  | 0.009  |       |        |
| SNORA24  | ENSG00000206903_s_st | -3.31 | 0.008 |       |        | 3.07  | 0.002  |
| SNORA38  | ENSG00000201042_s_st | -2.48 | 0.013 | 4.83  | 0.002  | 7.43  | <0.001 |
| SNORA38B | SNORA38B_s_st        | -2.87 | 0.019 |       |        | -2.26 | 0.022  |
| SNORA38B | SNORA38B_s_st        | -3.54 | 0.008 |       |        | -2.35 | 0.001  |
| SNORA38B | SNORA38B_s_st        | -2.09 | 0.043 | 3.72  | 0.003  | 4.83  | <0.001 |
| SNORD116 | ENSG00000202498_x_st | -2.18 | 0.006 |       |        | 2.37  | <0.001 |
| SPP1     | ENSG00000118785_at   | 3.65  | 0.039 |       |        | 2.16  | 0.040  |
| SRPX2    | ENSG00000102359_at   | 2.66  | 0.017 |       |        | 2.12  | 0.028  |
| TAGLN    | ENSG00000149591_at   | 2.76  | 0.027 | 3.56  | <0.001 | 6.04  | <0.001 |
| THBS4    | ENSG00000113296_at   | 2.66  | 0.021 |       |        | -3.40 | 0.003  |
| TYMS     | ENSG00000176890_at   | -2.11 | 0.003 | 8.91  | <0.001 | 7.73  | <0.001 |
| U104     | U104_st              | -2.22 | 0.005 |       |        | -4.85 | 0.023  |
| U105B    | U105B_st             | -2.30 | 0.018 |       |        | -3.61 | <0.001 |
| U23      | U23_st               | -2.89 | 0.001 | 2.76  | 0.004  | 4.88  | <0.001 |
| U23      | U23_st               | -2.91 | 0.010 | 3.13  | 0.003  | 5.08  | <0.001 |
| U28      | U28_st               | -2.62 | 0.009 | 4.18  | <0.001 | 5.10  | <0.001 |
| U3       | U3_s_st              | -2.44 | 0.010 | 3.57  | 0.030  | 5.14  | 0.004  |
| U31      | U31_st               | -3.10 | 0.014 | 3.40  | 0.001  | 5.21  | <0.001 |
| U3-2     | U3-2_s_st            | -2.19 | 0.020 | 4.52  | 0.029  | 5.25  | 0.014  |
| U3-3     | U3-3_s_st            | -2.29 | 0.016 | 3.70  | 0.008  | 5.25  | 0.001  |
| U34      | U34_st               | -2.30 | 0.024 |       |        | 2.08  | <0.001 |
| U3-4     | U3-4_s_st            | -2.65 | 0.009 | 3.05  | 0.026  | 5.27  | 0.001  |
| U36B     | U36B_st              | -2.03 | 0.023 | 3.53  | 0.005  | 5.33  | <0.001 |
| U37      | U37_st               | -2.34 | 0.016 | 3.03  | <0.001 | 5.37  | <0.001 |
| U38A     | U38A_x_st            | -3.03 | 0.012 | -3.28 | 0.004  | -3.75 | <0.001 |
| U38A     | U38A_x_st            | -3.16 | 0.014 | 3.09  | 0.019  | 5.39  | 0.001  |
| U43      | U43_st               | -2.10 | 0.043 | 3.32  | 0.001  | 5.41  | <0.001 |
| U43      | U43_st               | -2.16 | 0.023 | 3.57  | 0.006  | 5.43  | <0.001 |
| U48      | U48_st               | -2.79 | 0.019 | 3.63  | <0.001 | 5.44  | <0.001 |

|        |                    |       |       |       |        |      |        |
|--------|--------------------|-------|-------|-------|--------|------|--------|
| U50B   | U50B_st            | -2.28 | 0.026 | -3.15 | 0.001  |      |        |
| U58C   | U58C_x_st          | -2.26 | 0.008 |       |        |      |        |
| U68    | U68_st             | -2.07 | 0.043 | 7.53  | <0.001 | 5.50 | <0.001 |
| U68    | U68_st             | -2.37 | 0.014 | 4.34  | 0.006  | 5.50 | 0.001  |
| U74    | U74_x_st           | -2.49 | 0.018 | 4.12  | <0.001 | 5.56 | <0.001 |
| U75    | U75_x_st           | -2.00 | 0.023 | 3.38  | 0.005  | 5.68 | <0.001 |
| U75    | U75_x_st           | -2.46 | 0.038 | 2.91  | 0.034  | 5.71 | 0.001  |
| U99    | U99_st             | -2.22 | 0.005 | 8.14  | <0.001 | 5.76 | <0.001 |
| ZBTB20 | ENSG00000181722_at | 2.00  | 0.001 |       |        | 2.79 | <0.001 |
| ZEB1   | ENSG00000148516_at | 2.00  | 0.008 | 8.27  | <0.001 | 7.24 | <0.001 |
| ZG16B  | ENSG00000162078_at | -2.39 | 0.040 |       |        | 2.22 | 0.006  |

Only genes with an FDR<.05 for at least one comparisons are shown; MTX: metastatic colorectal cancer; non-MTX: non-metastatic colorectal cancer; hsa-miR: human micro-RNA. FDR: false discovery rate.

**Supplementary table 2.** Commercial antibodies used in the study.

| Antibody  | Clone                       | Dilution   | Manufacturer       | Interpretation                                                                                                                                                                                                                                                                                                                                                                                                                                                                                                    | Positive control                 |
|-----------|-----------------------------|------------|--------------------|-------------------------------------------------------------------------------------------------------------------------------------------------------------------------------------------------------------------------------------------------------------------------------------------------------------------------------------------------------------------------------------------------------------------------------------------------------------------------------------------------------------------|----------------------------------|
| CK7       | RN7                         | 1:100      | Novocastra         | Cytoplasmic stain                                                                                                                                                                                                                                                                                                                                                                                                                                                                                                 | Bladder (epithelium)             |
| CK20      | K <sub>s</sub> 20.8         | Prediluted | Novocastra         | Cytoplasmic stain                                                                                                                                                                                                                                                                                                                                                                                                                                                                                                 | Colon (epithelium)               |
| CDX2      | CDX2-88                     | Prediluted | Biocare            | Nuclear stain                                                                                                                                                                                                                                                                                                                                                                                                                                                                                                     | Colon (epithelium)               |
| MLH1      | G168-15                     | 1:25       | BD Pharmingen      | Negative: no tumor nuclei stained with internal positive control                                                                                                                                                                                                                                                                                                                                                                                                                                                  | Tonsil                           |
| MSH2      | FE11                        | Prediluted | Biocare            | Positive: at least one tumor nucleus stained with positive internal control                                                                                                                                                                                                                                                                                                                                                                                                                                       |                                  |
| MSH6      | BC/44                       | Prediluted | Biocare            |                                                                                                                                                                                                                                                                                                                                                                                                                                                                                                                   |                                  |
| PMS2      | M0R4G                       | 1:50       | Novocastra         | Negative: <10% positive nuclei                                                                                                                                                                                                                                                                                                                                                                                                                                                                                    | Tonsil                           |
| c-Myc     | Y69                         | Prediluted | Master Diagnostica | Positive: ≥10% positive nuclei                                                                                                                                                                                                                                                                                                                                                                                                                                                                                    |                                  |
| Her2      | Bond Oracle HER2 IHC System |            | Leica              | 0+: No reactivity or no membranous reactivity in any tumor cell<br>1+: Tumor cell cluster with a faint/barely perceptible membranous reactivity irrespective of percentage of tumor cells stained<br>2+: Tumor cell cluster with a weak to moderate complete, basolateral, or lateral membranous reactivity, irrespective of percentage of tumor cells stained<br>3+: Tumor cell cluster with a strong complete, basolateral, or lateral membranous reactivity, irrespective of percentage of tumor cells stained | Her2 control slide (Bond Oracle) |
| p53       | DO-7                        | 1:100      | Novocastra         | 0: no nuclei stained<br>1: 0-10% positive nuclei<br>2: ≥10% positive nuclei                                                                                                                                                                                                                                                                                                                                                                                                                                       | Tonsil                           |
| β-catenin | Polyclonal                  | Prediluted | Master Diagnostica | Negative: <30% positive nuclei<br>Positive: ≥30% positive nuclei                                                                                                                                                                                                                                                                                                                                                                                                                                                  | Colon (epithelium)               |
| CEA       | 12-140-1                    | 1:100      | Novocastra         | Negative: no stained cells or non-specific stain<br>Positive: any specific cytoplasmic stain                                                                                                                                                                                                                                                                                                                                                                                                                      | Colon (adenocarcinoma)           |
| EGFR      | 2-18C9                      | Prediluted | DAKO               | 0: no membranous stain in any tumor cell<br>1-10%: percentage of tumor cells with membranous stain<br>10-35%: percentage of tumor cells with membranous stain<br>>35%: percentage of tumor cells with membranous stain                                                                                                                                                                                                                                                                                            | Placenta                         |
| Ki-67     | SP6                         | 1:100      | Master Diagnostica | Negative: <50% positive nuclei<br>Positive: ≥50% positive nuclei                                                                                                                                                                                                                                                                                                                                                                                                                                                  | Tonsil                           |
